# Supplementary material for: Lanthanide–radical complexes derived from a nitronyl nitroxide ligand with chelating and bridging functions: structure and magnetic properties
Source: Royal Society of Chemistry journal article supplement (doi:10.1039/d4ce01184h), 2025-01-01
Supplement: d4ce01184h1.pdf [file d4ce01184h1.pdf]

## Supporting Information

### **Lanthanide-radical complexes deriving from a nitronyl nitroxide ligand with chelating and bridging function: structure and magnetic properties**

Yan Zhou, Junfang Xie, Xiaohui Huang, Chaoyi Jin, Yue Ma, Licun Li\*

*Department of Chemistry, Key Laboratory of Advanced Energy Materials Chemistry,  
College of Chemistry, Nankai University, Tianjin 300071, China*

\* *E-mail: llicun@nankai.edu.cn.*

**Table S1.** Selected bond distances (Å) and angles (deg) for complex **1**.

| <b>1 Gd</b>           |            |                   |            |
|-----------------------|------------|-------------------|------------|
| <i>Bond distances</i> |            |                   |            |
| Gd(1)-O(2)            | 2.384(4)   | Gd(2)-O(15)       | 2.366(4)   |
| Gd(1)-N(8)            | 2.691(5)   | Gd(2)-N(4)        | 2.698(5)   |
| Gd(1)-O(6)            | 2.421(4)   | Gd(2)-O(13)       | 2.398(4)   |
| Gd(1)-O(1)            | 2.403(4)   | Gd(2)-O(12)       | 2.393(4)   |
| Gd(1)-O(5)            | 2.366(4)   | Gd(2)-O(11)       | 2.395(4)   |
| Gd(1)-O(3)            | 2.398(4)   | Gd(2)-O(14)       | 2.401(4)   |
| Gd(1)-O(4)            | 2.404(4)   | Gd(2)-O(9)        | 2.444(4)   |
| Gd(1)-O(7)            | 2.347(4)   | Gd(2)-O(10)       | 2.355(4)   |
| Gd(1)-N(3)            | 2.777(5)   | Gd(2)-N(7)        | 2.771(5)   |
| O(15)-N(5)            | 1.292(6)   | N(1)-O(7)         | 1.289(6)   |
| N(2)-O(8)             | 1.258(7)   | N(46)-O(16)       | 1.266(7)   |
| <i>Angles</i>         |            |                   |            |
| O(2)-Gd(1)-N(8)       | 69.08(14)  | O(15)-Gd(2)-O(11) | 99.10(15)  |
| O(2)-Gd(1)-N(3)       | 72.45(14)  | O(15)-Gd(2)-O(14) | 79.91(14)  |
| N(8)-Gd(1)-N(3)       | 126.79(15) | O(15)-Gd(2)-O(9)  | 65.86(14)  |
| O(6)-Gd(1)-N(8)       | 125.40(15) | O(15)-Gd(2)-N(7)  | 65.11(14)  |
| O(6)-Gd(1)-N(3)       | 107.57(15) | N(4)-Gd(2)-N(7)   | 128.09(15) |
| O(1)-Gd(1)-N(8)       | 68.77(14)  | O(13)-Gd(2)-N(4)  | 68.48(14)  |
| O(1)-Gd(1)-N(3)       | 66.07(14)  | O(12)-Gd(2)-N(4)  | 69.77(14)  |
| O(5)-Gd(1)-N(8)       | 66.34(14)  | O(12)-Gd(2)-N(7)  | 138.21(14) |
| O(5)-Gd(1)-N(3)       | 136.00(14) | O(11)-Gd(2)-N(4)  | 128.51(14) |
| O(3)-Gd(1)-N(8)       | 70.10(14)  | O(11)-Gd(2)-N(7)  | 69.65(14)  |
| O(3)-Gd(1)-N(3)       | 139.51(14) | O(14)-Gd(2)-N(4)  | 70.34(14)  |
| O(4)-Gd(1)-N(8)       | 129.06(14) | O(14)-Gd(2)-N(7)  | 66.33(14)  |
| O(4)-Gd(1)-N(3)       | 71.54(14)  | O(9)-Gd(2)-N(4)   | 124.06(14) |
| O(7)-Gd(1)-N(8)       | 126.66(15) | O(9)-Gd(2)-N(7)   | 107.78(14) |
| O(7)-Gd(1)-N(3)       | 65.92(14)  | O(10)-Gd(2)-N(4)  | 66.97(15)  |
| O(15)-Gd(2)-N(4)      | 132.35(15) | O(10)-Gd(2)-N(7)  | 134.88(14) |
| O(15)-Gd(2)-O(13)     | 136.94(14) | N(5)-O(15)-Gd(2)  | 129.4(4)   |
| O(15)-Gd(2)-O(12)     | 135.90(14) | N(1)-O(7)-Gd(1)   | 132.6(3)   |

| <b>2 Nd</b>           |           |                    |           |
|-----------------------|-----------|--------------------|-----------|
| <i>Bond distances</i> |           |                    |           |
| Nd(1)-O(2)            | 2.454(6)  | Nd(2)-O(8)         | 2.403(6)  |
| Nd(1)-O(3)            | 2.426(6)  | Nd(2)-O(12)        | 2.433(6)  |
| Nd(1)-O(7)            | 2.419(7)  | Nd(2)-O(9)         | 2.447(5)  |
| Nd(1)-O(4)            | 2.451(6)  | Nd(2)-O(11)        | 2.451(6)  |
| Nd(1)-O(1)            | 2.381(6)  | Nd(2)-O(10)        | 2.446(6)  |
| Nd(1)-O(6)            | 2.429(8)  | Nd(2)-O(14)        | 2.402(6)  |
| Nd(1)-O(5)            | 2.450(6)  | Nd(2)-O(13)        | 2.470(6)  |
| Nd(1)-N(2)            | 2.686(7)  | Nd(2)-N(6)         | 2.728(8)  |
| Nd(1)-N(1)            | 2.792(8)  | Nd(2)-N(3)         | 2.796(8)  |
| O(1)-N(4)             | 1.291(10) | O(16)-N(5)         | 1.261(11) |
| O(8)-N(8)             | 1.279(10) | O(15)-N(7)         | 1.248(12) |
| <i>Angles</i>         |           |                    |           |
| O(2)-Nd(1)-N(1)       | 65.5(2)   | O(8)-Nd(2)-O(12)   | 98.1(2)   |
| O(3)-Nd(1)-N(2)       | 69.7(2)   | O(8)-Nd(2)-O(9)    | 81.2(2)   |
| O(3)-Nd(1)-N(1)       | 72.3(2)   | O(8)-Nd(2)-O(11)   | 136.4(2)  |
| O(7)-Nd(1)-N(2)       | 66.3(2)   | O(8)-Nd(2)-O(10)   | 136.0(2)  |
| O(7)-Nd(1)-N(1)       | 135.3(2)  | O(8)-Nd(2)-O(13)   | 66.4(2)   |
| O(4)-Nd(1)-N(2)       | 128.9(2)  | O(8)-Nd(2)-N(6)#1  | 133.1(2)  |
| O(4)-Nd(1)-N(1)       | 72.5(2)   | O(8)-Nd(2)-N(3)    | 64.0(2)   |
| O(1)-Nd(1)-O(2)       | 76.0(2)   | O(12)-Nd(2)-N(6)#1 | 128.7(2)  |
| O(1)-Nd(1)-O(3)       | 134.2(2)  | O(12)-Nd(2)-N(3)   | 69.6(2)   |
| O(1)-Nd(1)-O(7)       | 73.7(2)   | O(9)-Nd(2)-N(6)#1  | 70.1(2)   |
| O(1)-Nd(1)-O(4)       | 105.0(2)  | O(9)-Nd(2)-N(3)    | 66.4(2)   |
| O(1)-Nd(1)-O(6)       | 69.5(2)   | O(11)-Nd(2)-N(6)#1 | 70.2(2)   |
| O(1)-Nd(1)-O(5)       | 140.2(2)  | O(11)-Nd(2)-N(3)   | 137.1(2)  |
| O(1)-Nd(1)-N(2)       | 126.1(2)  | O(10)-Nd(2)-N(6)#1 | 68.4(2)   |
| O(1)-Nd(1)-N(1)       | 65.1(2)   | O(10)-Nd(2)-N(3)   | 73.5(2)   |
| O(6)-Nd(1)-N(2)       | 123.9(2)  | O(14)-Nd(2)-O(8)   | 76.0(2)   |
| O(6)-Nd(1)-N(1)       | 108.3(2)  | O(14)-Nd(2)-N(6)#1 | 66.7(2)   |
| O(5)-Nd(1)-N(2)       | 70.0(2)   | O(14)-Nd(2)-N(3)   | 134.4(2)  |
| O(5)-Nd(1)-N(1)       | 139.3(2)  | O(13)-Nd(2)-N(6)#1 | 122.0(2)  |
| N(2)-Nd(1)-N(1)       | 127.4(2)  | O(13)-Nd(2)-N(3)   | 109.0(2)  |
| N(8)-O(8)-Nd(2)       | 128.9(6)  | N(6)#1-Nd(2)-N(3)  | 128.8(2)  |
| N(4)-O(1)-Nd(1)       | 131.9(5)  | O(2)-Nd(1)-N(2)    | 68.9(2)   |

**Table S2.** Selected bond distances (Å) and angles (deg) for complex **2**.

**Table S3.** Selected bond distances (Å) and angles (deg) for complex **3**.

| <b>3 Dy</b>           |          |                   |           |
|-----------------------|----------|-------------------|-----------|
| <i>Bond distances</i> |          |                   |           |
| Dy(1)-O(5)            | 2.337(8) | Dy(2)-O(20)       | 2.313(7)  |
| Dy(1)-O(4)            | 2.368(8) | Dy(2)-O(17)       | 2.318(7)  |
| Dy(1)-O(2)            | 2.315(8) | Dy(3)-O(9)        | 2.352(9)  |
| Dy(1)-O(3)            | 2.343(7) | Dy(3)-O(11)       | 2.320(9)  |
| Dy(1)-O(6)            | 2.293(9) | Dy(3)-O(8)        | 2.297(8)  |
| Dy(1)-O(1)            | 2.305(9) | Dy(3)-O(10)       | 2.328(8)  |
| Dy(1)-O(7)            | 2.332(9) | Dy(3)-O(13)       | 2.330(10) |
| Dy(1)-N(1)            | 2.604(9) | Dy(3)-N(2)        | 2.619(9)  |
| Dy(2)-O(19)           | 2.350(7) | Dy(3)-O(14)       | 2.312(9)  |
| Dy(2)-O(18)           | 2.353(7) | Dy(3)-O(12)       | 2.359(10) |
| Dy(2)-O(15)           | 2.322(7) | O(8)-N(7)         | 1.303(11) |
| Dy(2)-O(16)           | 2.331(8) | O(22)-N(8)        | 1.254(13) |
| Dy(2)-N(4)            | 2.543(9) | O(1)-N(5)         | 1.287(12) |
| Dy(2)-N(3)            | 2.570(8) | O(21)-N(6)        | 1.254(13) |
| <i>Angles</i>         |          |                   |           |
| O(1)-Dy(1)-O(5)       | 141.3(3) | O(16)-Dy(2)-N(4)  | 112.1(3)  |
| O(1)-Dy(1)-O(4)       | 78.9(3)  | O(16)-Dy(2)-N(3)  | 78.6(3)   |
| O(1)-Dy(1)-O(2)       | 82.1(3)  | N(4)-Dy(2)-N(3)   | 141.8(3)  |
| O(1)-Dy(1)-O(3)       | 141.3(3) | N(7)-O(8)-Dy(3)   | 125.3(7)  |
| O(1)-Dy(1)-O(7)       | 70.1(3)  | O(18)-Dy(2)-N(3)  | 119.6(3)  |
| O(1)-Dy(1)-N(1)       | 70.3(3)  | O(15)-Dy(2)-N(4)  | 74.9(3)   |
| O(6)-Dy(1)-O(1)       | 109.8(4) | O(7)-Dy(1)-N(1)   | 117.1(3)  |
| O(6)-Dy(1)-N(1)       | 76.3(3)  | O(9)-Dy(3)-N(2)   | 70.3(3)   |
| O(4)-Dy(1)-N(1)       | 71.8(3)  | O(11)-Dy(3)-N(2)  | 78.9(3)   |
| O(2)-Dy(1)-N(1)       | 141.2(3) | O(8)-Dy(3)-O(9)   | 83.5(3)   |
| O(3)-Dy(1)-N(1)       | 144.2(3) | O(8)-Dy(3)-O(10)  | 143.4(3)  |
| O(5)-Dy(1)-N(1)       | 76.3(3)  | O(8)-Dy(3)-O(13)  | 71.8(3)   |
| N(5)-O(1)-Dy(1)       | 127.6(7) | O(8)-Dy(3)-N(2)   | 69.0(3)   |
| O(20)-Dy(2)-N(4)      | 143.5(2) | O(8)-Dy(3)-O(14)  | 80.3(3)   |
| O(20)-Dy(2)-N(3)      | 72.5(3)  | O(8)-Dy(3)-O(12)  | 141.5(4)  |
| O(17)-Dy(2)-N(4)      | 76.2(3)  | O(10)-Dy(3)-N(2)  | 77.1(3)   |
| O(17)-Dy(2)-N(3)      | 76.3(3)  | O(13)-Dy(3)-N(2)  | 119.2(3)  |
| O(19)-Dy(2)-N(4)      | 77.1(3)  | O(14)-Dy(3)-N(2)  | 136.4(3)  |
| O(19)-Dy(2)-N(3)      | 139.1(3) | O(12)-Dy(3)-N(2)  | 146.2(3)  |
| O(18)-Dy(2)-N(4)      | 75.5(3)  | O(14)-Dy(3)-O(11) | 142.4(3)  |

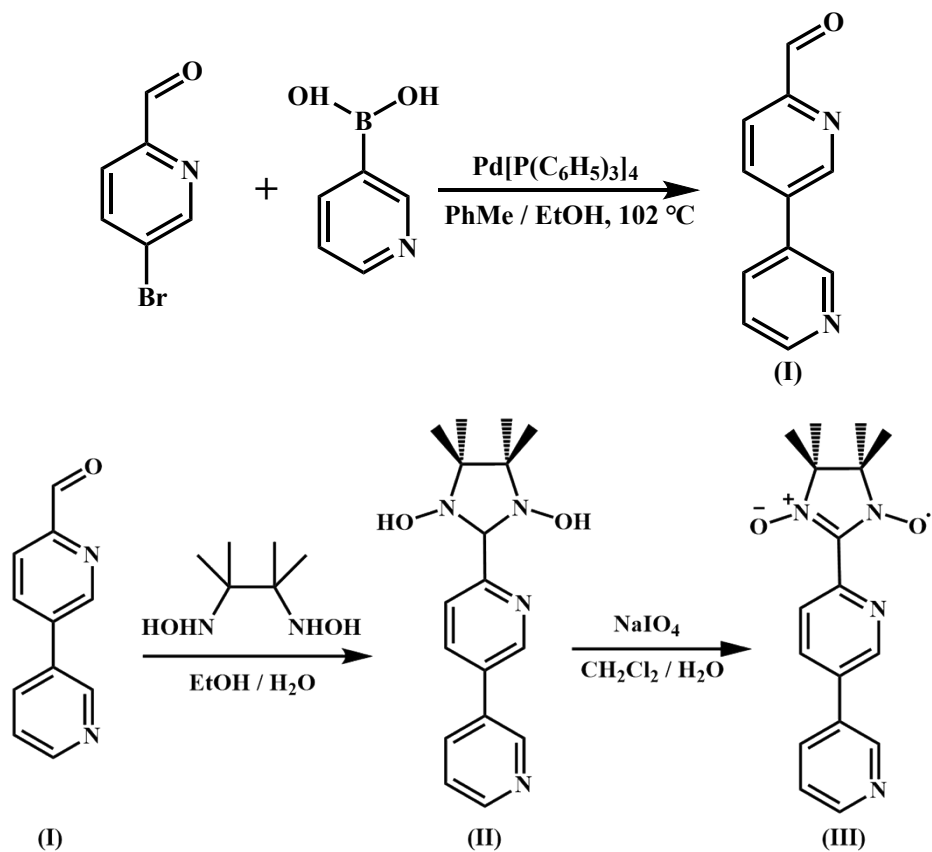

**Scheme S1.** The synthesis of NIT-2Py-3Py radical ligand.

**Table S4.** SHAPE analyses for complexes 1–2.

| Complex      | CSAPR-9      | MFF-9 | JCSAPR-9 | TCTPR-9 |
|--------------|--------------|-------|----------|---------|
| <b>1 Gd1</b> | <b>0.505</b> | 0.912 | 0.915    | 1.413   |
| <b>1 Gd2</b> | <b>0.611</b> | 1.079 | 1.033    | 1.706   |
| <b>2 Nd1</b> | <b>0.528</b> | 0.804 | 1.071    | 1.368   |
| <b>2 Nd2</b> | <b>0.724</b> | 1.072 | 1.204    | 1.750   |

MFF-9:  $C_s$ , Muffin; CSAPR-9:  $C_{4v}$ , Spherical capped square antiprism; JCSAPR-9:  $C_{4v}$ , Capped square antiprism J10; TCTPR-9:  $D_{3h}$ , Spherical tricapped trigonal prism.

Table S5. SHAPE analysis for complex **3**.

| Complex      | SAPR-8       | JBTPR-8 | BTPR-8 | TDD-8 |
|--------------|--------------|---------|--------|-------|
| <b>3 Dy1</b> | <b>0.359</b> | 2.035   | 1.904  | 2.096 |
| <b>3 Dy2</b> | <b>0.394</b> | 2.257   | 2.047  | 2.143 |
| <b>3 Dy3</b> | <b>0.462</b> | 2.006   | 1.911  | 2.113 |

SAPR-8:  $D_{4d}$ , Square antiprism; JBTPR-8:  $C_{2v}$ , Biaugmented trigonal prism J50; BTPR-8:  $C_{2v}$ , Biaugmented trigonal prism; TDD-8:  $D_{2d}$ , Triangular dodecahedron.

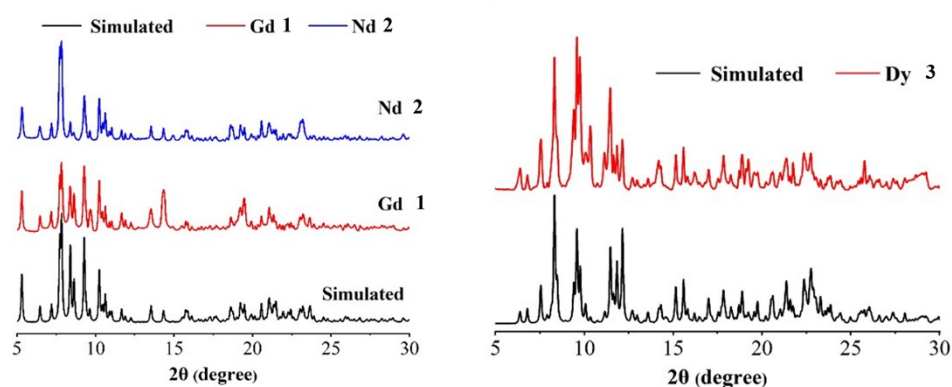

Fig. S1. The PXRD pattern of complexes 1-3.

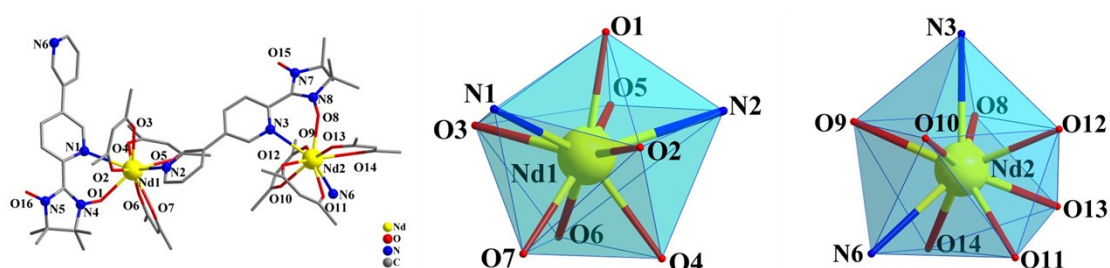

Fig. S2. Asymmetric structural unit of **2** (H and F atoms are omitted for clarity) (left); the coordination polyhedra of  $Nd^{III}$  ions in **2** (right).

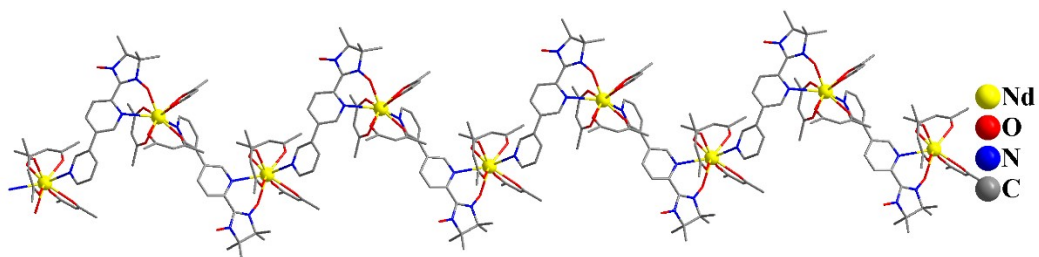

Fig. S3. One-dimensional structure of **2** (H and F atoms are omitted for clarity).

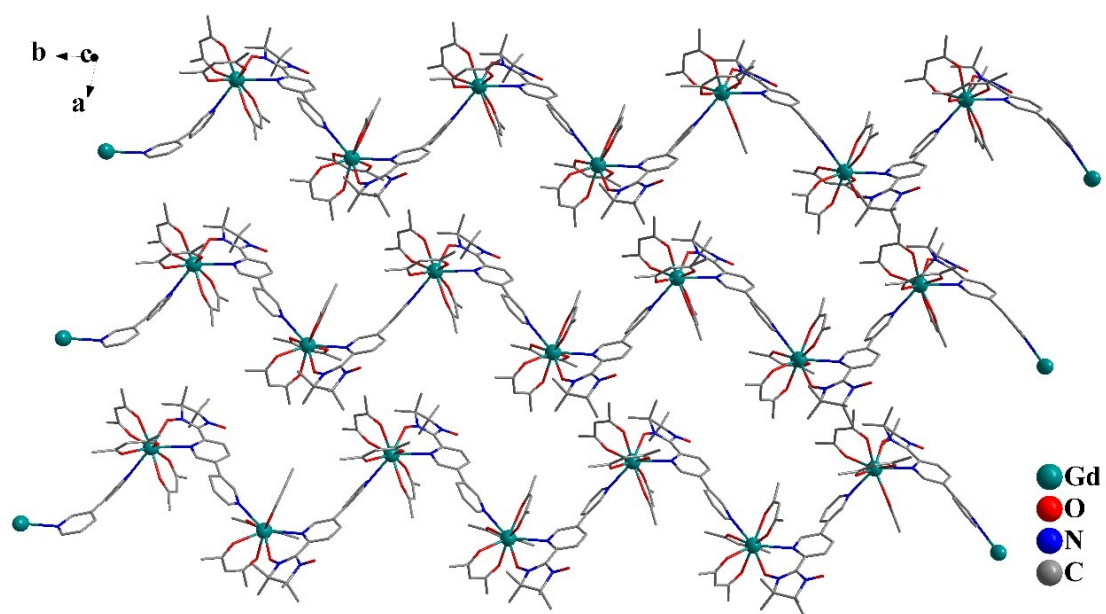

Fig. S4. Crystal packing diagram of **1** (H and F atoms are omitted).

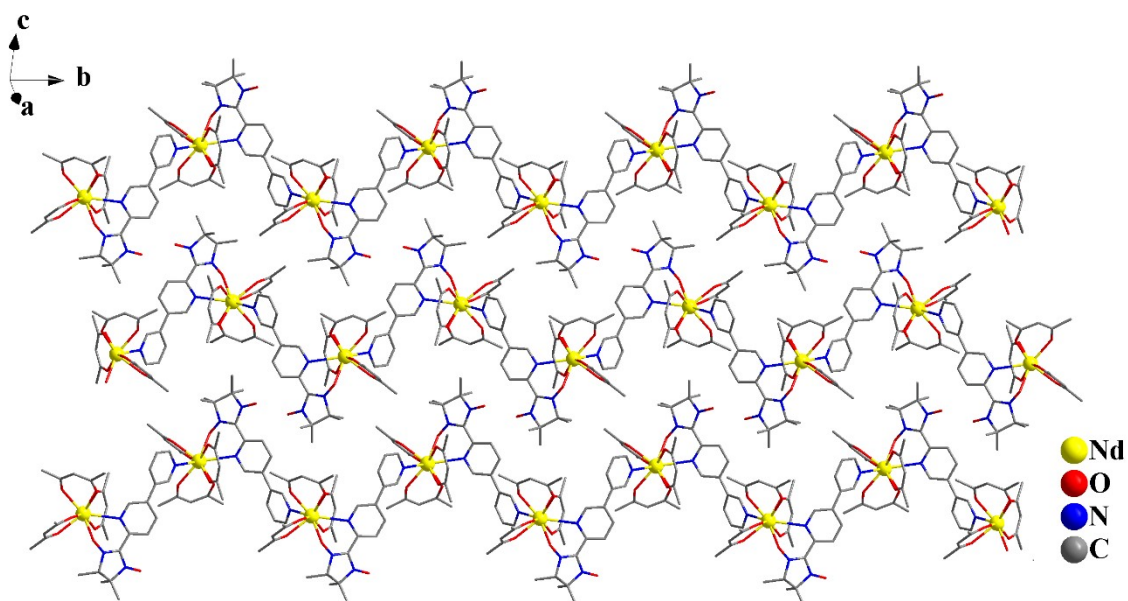

Fig. S5. Crystal packing diagram of **2** (H and F atoms are omitted).

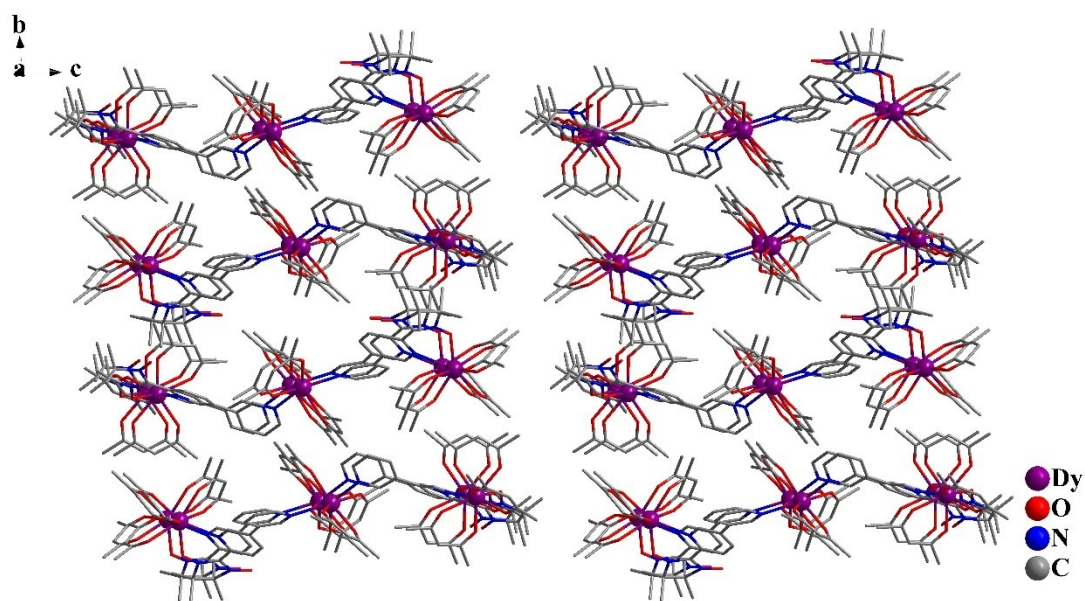

Fig. S6. Crystal packing diagram of **3** (H and F atoms are omitted).



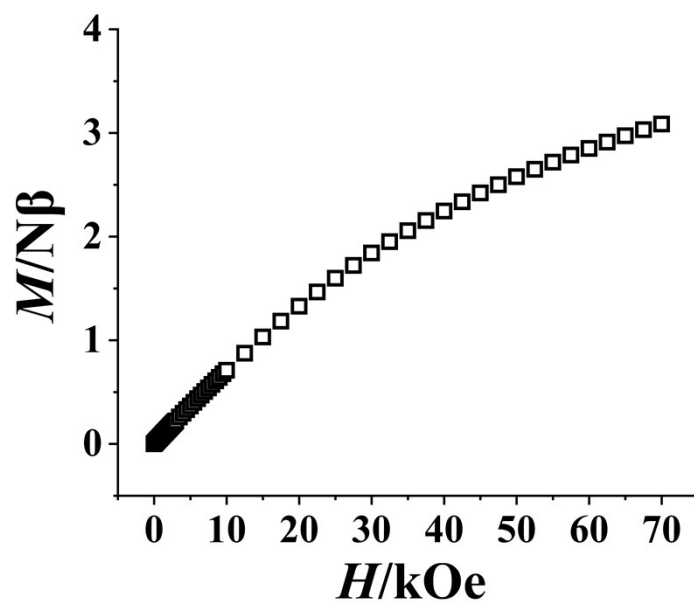

**Fig. S7.** Magnetization versus applied field curve measured at 2 K for complex 2.

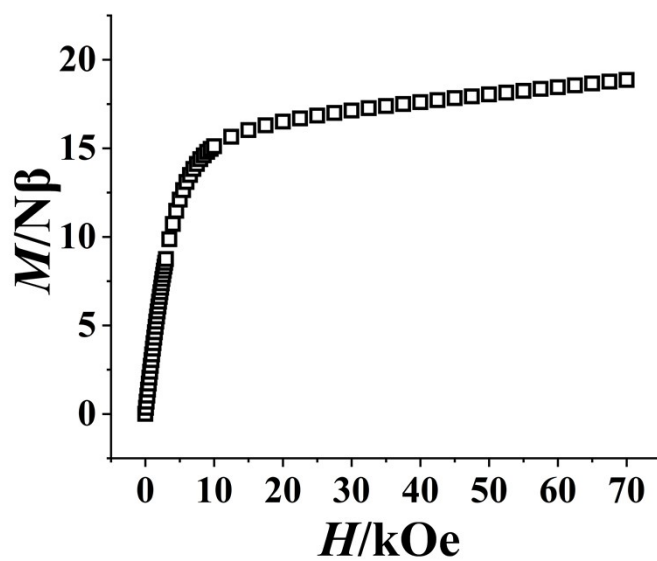

**Fig S8.** Magnetization versus applied field curve measured at 2 K for complex 3.

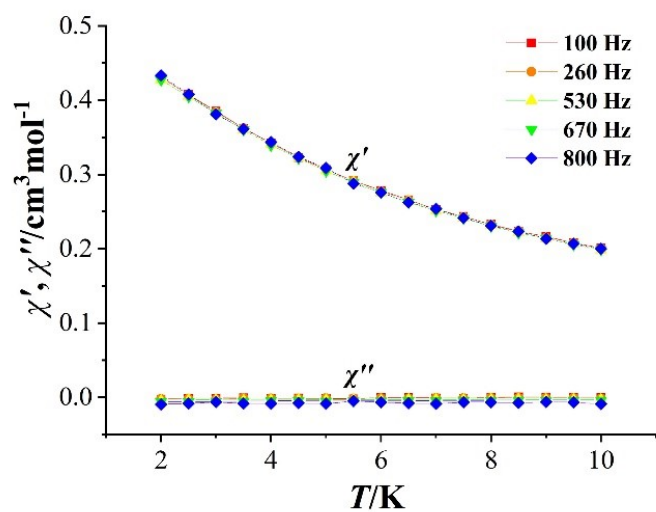

Fig. S9. Frequency-dependent ac signals of  $\chi'$  and  $\chi''$  under 0 Oe dc field for **2**.

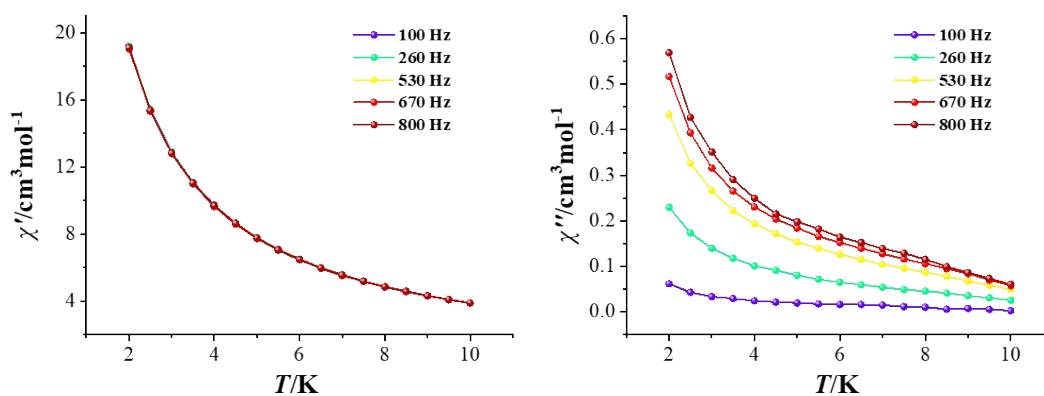

Fig. S10. Variable temperature  $\chi'$  and  $\chi''$  curves for complex **3** under a zero dc field.

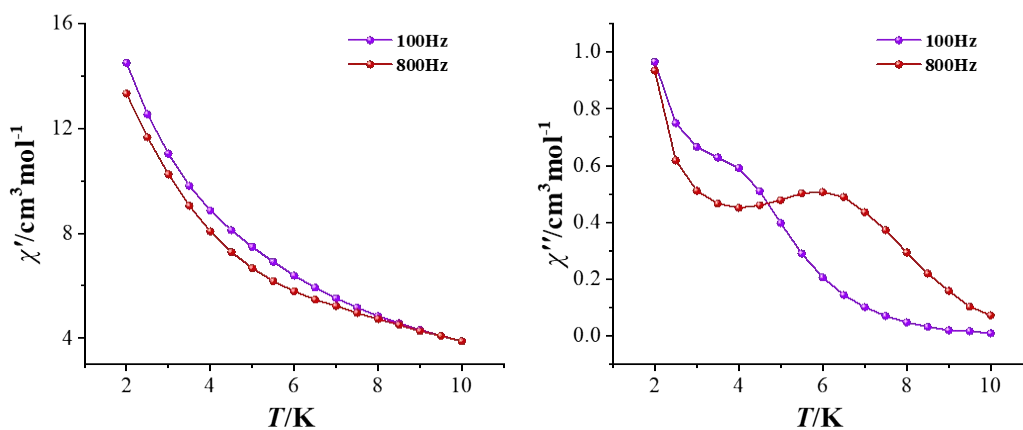

Fig. S11. Variable temperature  $\chi'$  and  $\chi''$  curves for complex **3** under 1000 Oe dc field.
